# Supplementary material for: The MIPAS global climatology of BrONO 2 2002–2012: a test for stratospheric bromine chemistry
Source: Copernicus journal article supplement (doi:10.5194/acp-2021-535), 2021-08-11

We would like to thank the referee Rafael Pedro Fernandez for his in-depth comments and suggestion which helped a lot to improve the manuscript. Find below our detailed answers to each of the comments/corrections.

- *The total stratospheric Bry value of  $21.2 \pm 1.4$  pptv of Bry at mid-latitudes has been estimated for the 40-60S and 40-60N but without considering the  $10^\circ$  latitudinal bins used in previous sections. Wouldn't it help to evaluate if there is any Stratospheric Bry trend and/or sink by means of computing Bry at different latitudes and heights? In particular, Section 4 (Fig. 12) would benefit of a discussion comparing the almost negligible trend in MIPAS Bry trend between 1996-2007 with the reported value in WMO of  $-0.16 \pm 0.07$  ppt for the 2004-2014 period.*

Thanks for this suggestion. We agree that it could make sense to investigate these latitude/altitude/time dependent distributions in much more detail in future work. For the present manuscript we have mainly concentrated on showing examples and their variability regarding the derived total stratospheric Bry from three different latitude/altitude regions (see Fig. 12) to judge how/if these estimations are in general agreement with Bry derived from BrO observations. This can also be regarded as kind of a first, still quite indirect validation of our retrievals. Still, as suggested by the referee, we will provide the more detailed view on the time series for the  $10^\circ$  latitude bins as a supplement to the manuscript and have included it also here at the end (Figures 1, below). Furthermore, deriving trends is also beyond the scope of this work as we see it. Because the time span of the MIPAS observations (with respect to the derived year of stratospheric entry) is just around the maximum of the stratospheric bromine content, a simple trend may even not be the suitable description for the time series.

- *The authors suggest that the low modeled polar BrONO<sub>2</sub> during winter is caused by a low bias in NO<sub>2</sub> abundance due to missing mesospheric NO<sub>2</sub> production in the model (dif\_1). However, for dif\_2 and dif\_3, they highlight different competing processes, but they do not mention even once that an erroneous modeled NO<sub>2</sub> abundance could also be affecting the model-observation disagreement. I think this should be explicitly mentioned for all cases. In particular, for dif\_2, Barrera et al., (2020) highlighted that VSL bromine impacts in the mid-latitudes depend on the recycling efficiency of ClONO<sub>2</sub> and HCl in the lowermost stratosphere. Could modeled ClONO<sub>2</sub> recycling also be affecting NO<sub>2</sub> abundance in the lower stratosphere and indirectly affecting the modeled BrONO<sub>2</sub> sinks?*

As can be seen in Figs. B1 and B2 of the manuscript's appendix, there is quite a broad consistency between the retrieved and modelled mixing ratios of NO<sub>2</sub>. The main differences are the nighttime values at high winter latitudes, as proposed in our manuscript as reason for the model's underestimation of BrONO<sub>2</sub> there. We have not mentioned the aspect of wrongly modelled NO<sub>2</sub> mixing ratios as possible explanation in relation to dif\_2 and dif\_3 since NO<sub>2</sub> agrees quite well for these cases. To show this clearer, we have added plots equivalent to Figures 9 and 11 of the manuscript but for NO<sub>2</sub> (see Figure 2 below): these show a very good agreement of modelled and measured NO<sub>2</sub> up to 26 km altitude. Thus, dif\_2 is very probably not due to wrong modelling of NO<sub>2</sub>. Above 26 km altitude, there are some deviations in NO<sub>2</sub> mixing ratios,

however, at most 20% between the measurements and EMAC or the 1d-model. These deviations cannot account for the daytime model underestimation of BrONO<sub>2</sub> (dif\_3) – the slight overestimation of NO<sub>2</sub> by EMAC around 30 km would even point toward the wrong direction. We have added a paragraph in the manuscript describing the role of NO<sub>2</sub> for dif\_2 and dif\_3 accordingly and add the related Figures to the NO<sub>2</sub> overview Figures in Appendix B.

*Minor comments:*

*P4, L109: "the related a-priori profile for the target species BrONO<sub>2</sub> was set to zero": I'm not an expert in this field, but I thought that for satellite retrievals it was necessary to include a non-zero a-priori profile.*

In case of first order Tikhonov-regularisation using volume mixing ratios (and not log(vmr)) as retrieved quantities, a zero a-priori profile is generally possible. However, in our case the referee is right that we have actually used an altitude-constant a-priori profile with BrONO<sub>2</sub> mixing ratios of 0.1 pptv. We have corrected this in the manuscript.

*P5, L138: "Around that, the blue shading indicates the variability of the estimated errors between all latitude bands". Please rephrase. Does "that" points at the mean total error? Is it "between" or "for" all latitudes?*

Sorry that the sentence was not clear. It is corrected to 'Around this total error estimate, the blue shading indicates the variability of the estimated errors for all latitude bands'.

*Fig. 1: Rapid eye-reading the figure, it is evident that below 20 km, Tot parameter errors and spectral noise are the dominant contribution to the total error, while at higher heights it is mostly dominated by spectral noise. A simple sentence on the text highlighting this would be useful.*

We have added this information in the manuscript.

*P8, L167: "During the MIPAS measurement periods, from the model output first all data within one hour around 10 LT and 22 LT were selected. Depending on their latitude, longitude and altitude, they were then assigned to day and night-time conditions and averaged over the observational bins of 10 latitude and three-day periods". Do you mean that model output was filtered for specific hours to match MIPAS observations? And also, did you consider any additional condition to filter day/night time values very close to twilight conditions where the radiation intensity is reduced (mostly at high latitudes). Please make it clear.*

Due to the sun-synchronous orbit of Envisat, MIPAS measurements took place around 10 am/pm local solar time. Thus, the selection with respect to local solar time 'follows' the trace of the satellite. Then the assignment to sunlit or observations in the dark is made through calculating the solar elevation at each point. We have made this clearer in the revised manuscript. The referee is also

right that at high latitudes, scenes with solar elevation angles near zero might be included and be difficult to interpret. However, the considerations and conclusions made in the manuscript refer to situations which are not affected by such solar geometries. We have added in the text a note of caution about such scenes.

*P9, L193: Do you mean a "seasonal" signal instead of annual? What do you mean by outstanding?. Finally, it would be useful to provide a couple of sentences summarizing the Maximum and Minimum values observed for different heights and latitudes before getting into the MIPAS-Modelling comparison.*

Sorry for the unclear formulation: We have changed it to 'The lack of a similarly clear seasonal variability at tropical latitudes.' We have added information about the observed mixing ratios as recommended by the referee.

*P16, L198: What is the Averaging Kernel Matrix? A kernel including the 10 LT and 22 LT hours? If that is the case, please make it consistent to the description in Section 2.2.*

Sorry for the misunderstanding. What we mean here are the vertical averaging kernel matrices which are diagnostics characterizing the MIPAS profile retrievals of BrONO<sub>2</sub> regarding vertical resolution. We refer to the averaging kernels in section 2.1 with the citation of the book by Rodgers (2004). We have tried to make this clearer in the new version of the manuscript by changing the sentence to: 'To take into the account the limited vertical resolution of the measurements for these comparisons, we have applied the averaging kernel matrix of each retrieved profile of BrONO<sub>2</sub> (see Sect. 2.1) to the related modelled profile'.

*P16, L220: "Such differences are also present during day, albeit to a smaller extent (up to about 4 pptv, see Fig. 8)." ... due to the smaller BrONO2 abundance. Clearly, as BrONO2 levels are higher during the night, then the absolute differences will be higher during the night than during the day, where BrONO2 vmr are smaller. I wonder if the relative/percentage difference between model and observations are similar during the day than during the night? Independently of the answer, this could be explicitly mentioned in the text.*

Yes, during day the relative differences between measurement and model at around 20 km in mid-latitudes and 22-25 km in the tropics are similar to nighttime relative differences with about 50%. Below these altitudes, the daytime relative differences become much larger due to the very small values of BrONO<sub>2</sub> there and are difficult to compare. We have added a related sentence in the revised manuscript.

*Fig. 9: The "diff night" and "diff day" panels show a very similar profile, though the absolute variation is considerably different. Have you estimated if the relative/percentage difference between day/night are similar?*

We have replotted Fig. 9 with relative differences (see Figure 3 below): the nighttime effect of changing SAD on BrONO<sub>2</sub> mixing ratios is about a factor of 10 larger in relative terms compared to the daytime effect.

*P24, Eq.1: You have only applied the expression to night-time modelled values. Have you performed the same analysis with daytime values? If so, did you find any difference worth to be mentioned?*

We have not performed the analysis on daytime measurements. Our goal was to get the best possible estimate of  $B_{ry}$  which we think can best be estimated when the correction (Eq.1) is smallest. For a much more in-depth analysis it could be a good idea to inspect also  $BrO$  values derived from daytime measurements (e.g. in combination with the Sciamachy dataset of  $BrO$ ).

*P25, L345-346: "Since the model adjustment of  $B_{ry}$  from  $BrONO_2$  is much larger in the tropical stratosphere (about 2.5 pptv) than at mid-latitudes (about 0.5 pptv), the second explanation would affect more strongly our estimation of  $B_{ry}$  in the tropics." What do you mean here? That the estimated  $B_{ry}$  will be more realistic for high  $BrONO_2/B_{ry}$  ratios?*

*Wouldn't it be worth to compare the  $B_{ry}$  estimation for each latitudinal bin of  $10^\circ$  at different seasons, and to determine if the estimated  $B_{ry}$  stratospheric abundance for each band is consistent?*

The 'second' explanation refers to the application of Eq. 1, i.e. the correction using the modelled  $B_{ry}/BrONO_2$  ratio. We will make the sentence clearer in the revised manuscript. For a discussion on  $B_{ry}$  estimation from each latitude bin: see our comment above under the 1<sup>st</sup> major issue.

*Fig. 12: I found a bit confusing that the colored symbols with measurements (other than MIPAS) at different locations are shown in all 3 panels. Wouldn't it be better to include in each panel only those observation corresponding to the latitudinal band where it was measured?*

We have repeated the non-MIPAS measurements in all panels to guide the eye. Therefore, we would like to leave them in all panels. However, in the new plot as shown in Figure 4 below, now we highlight the location (south, tropics, north) of the related observations by larger symbols.

*Fig. B1 and B2: It could be useful to show the modelled  $NO_2$  difference in a 3<sup>rd</sup> column on the right, as it has been shown for  $BrONO_2$  in the main text.*

Has been done: see Figures 5 and 6 below.

*Would it be worth to include the estimated AOA in the published dataset?*

We will add the information that this dataset is available on request from Gabriele Stiller (gabriele.stiller@kit.edu).

*Language editing comments:*

*P1, L10-11: Rephrase item (1) in the abstract.*

It is not clear to us why (1) should be rephrased. Thus, we tend not to change the wording.

*P2, L33: ist produced à is produced*

Corrected.

*P2, L35: coupled strongly à strongly coupled*

Done.

*P3, L69: VSLS should be defined after it first usage in L64.*

Done.

*P4,5: ESA, HITRAN, ECMWF, etc. acronyms are not defined.*

Done.

*P16, L209: "values of less than" à "values smaller than"*

Done.

*P17, L259: Define SAD as it first usage in L244.*

Done.

*P22, L299: Tab. D1 à Table D1*

Done

*P24, L327: Dependent à Depending*

Done.

*P24, L337: "vary from 21.0 +/- 1.4 pptv and 21.4 +/- 1.4 pptv for the northern and southern mid-latitude regions", respectively.*

Done.

*P25, L350: Replace Obviously by Notably or other word ... as it is not obvious that measurements performed with different instrument will provide equivalent results.*

Done.

## *References*

*Barrera, J. A., Fernandez, R. P., Iglesias-Suarez, F., Cuevas, C. A., Lamarque, J.-F., and Saiz-Lopez, A.: Seasonal impact of biogenic very short-lived bromocarbons on lowermost stratospheric ozone between 60° N and 60° S during the 21st century, Atmos. Chem. Phys., 20, 8083–8102, <https://doi.org/10.5194/acp-20-8083-2020>, 2020.*

Figures 1 below are equivalent to Fig. 12 of the manuscript but for bins of  $10^\circ$  latitude and 2 km altitude: series of averaged MIPAS BrONO<sub>2</sub> measurements (dark blue dots) and derived total stratospheric Br<sub>y</sub> (red dots) for different altitude and latitude bands over the time of stratospheric entry. Dark blue and red lines indicate the related time averaged mean values over the whole period and the red shading indicates the estimated 1-sigma uncertainty.

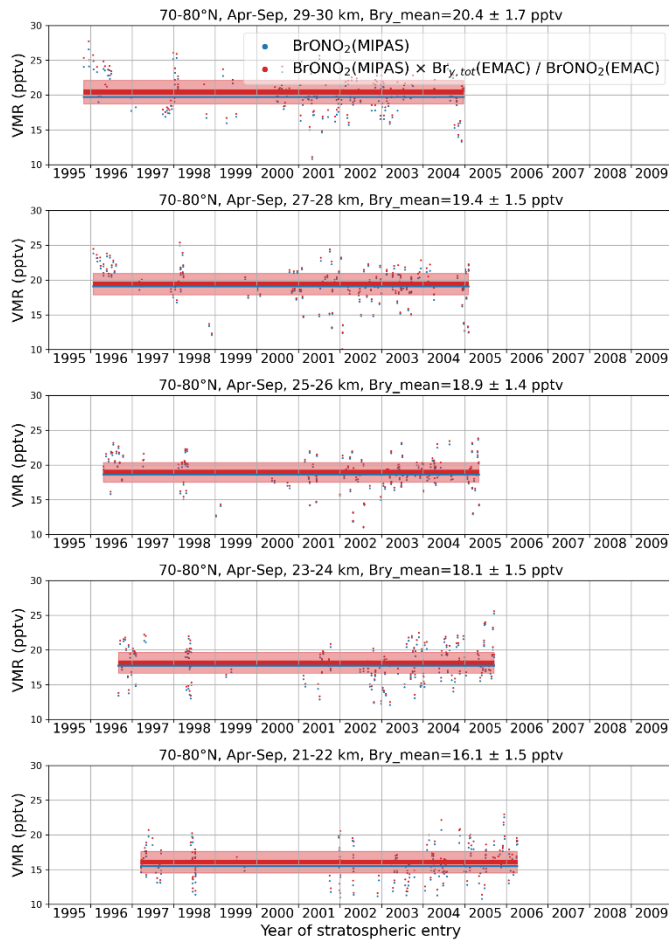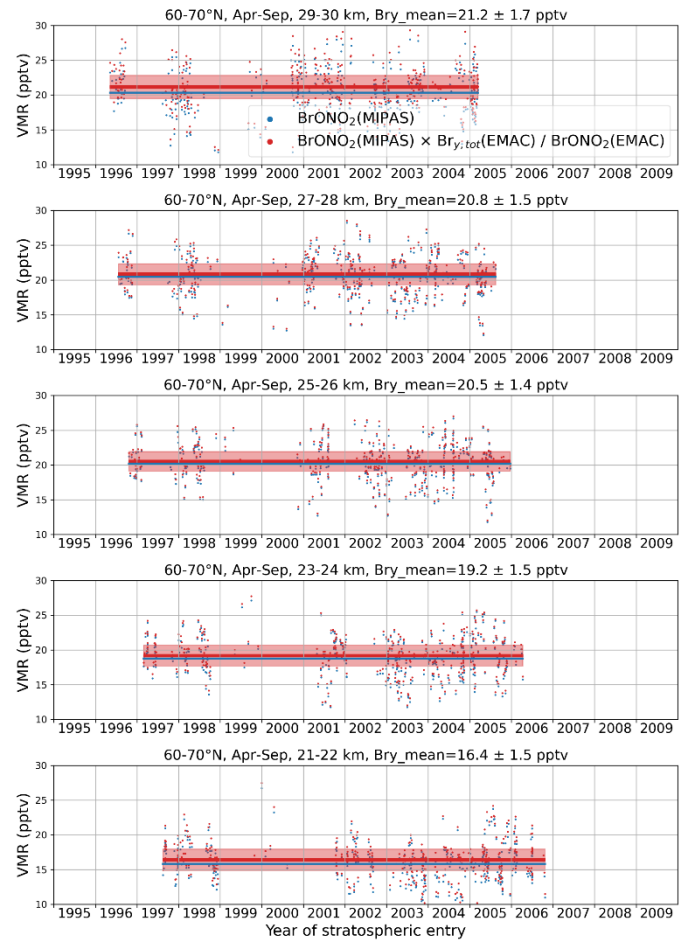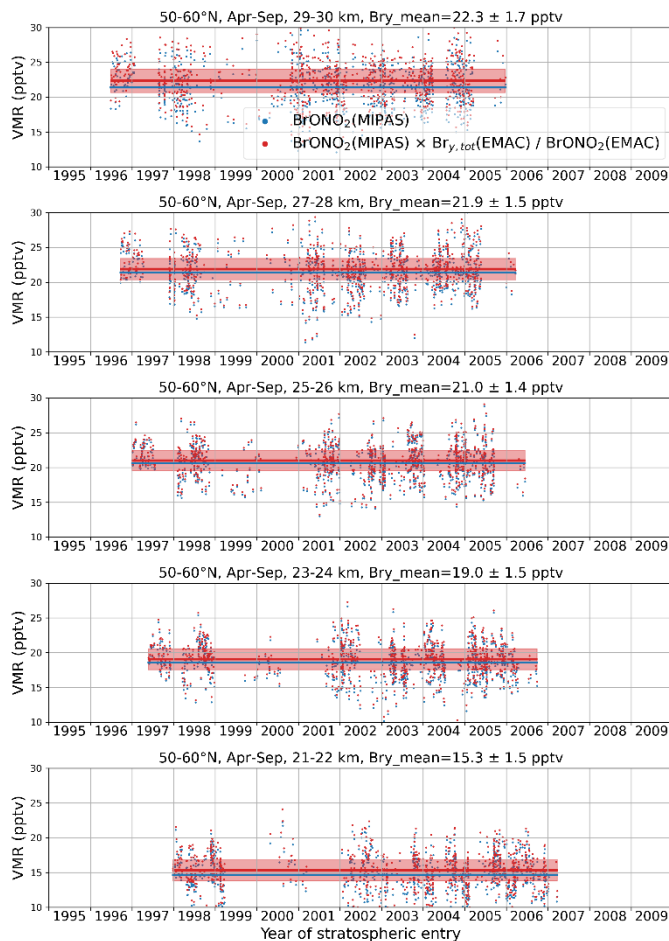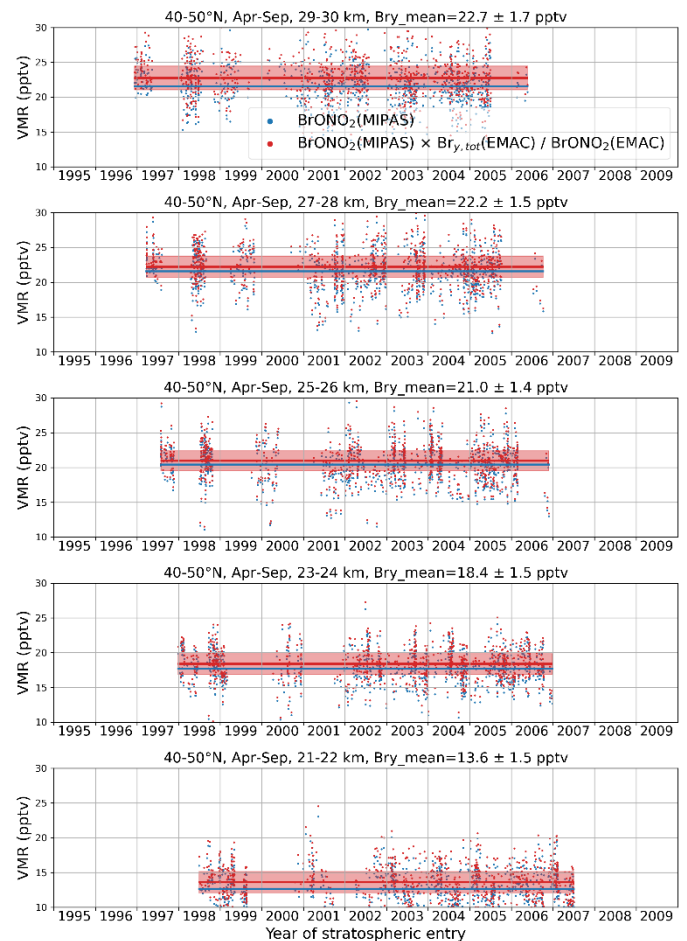

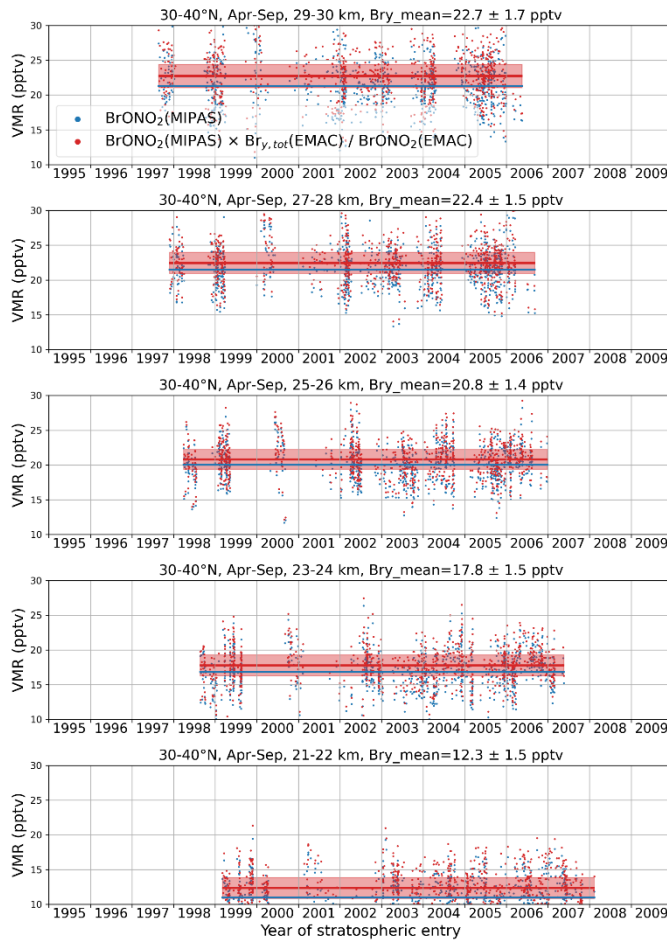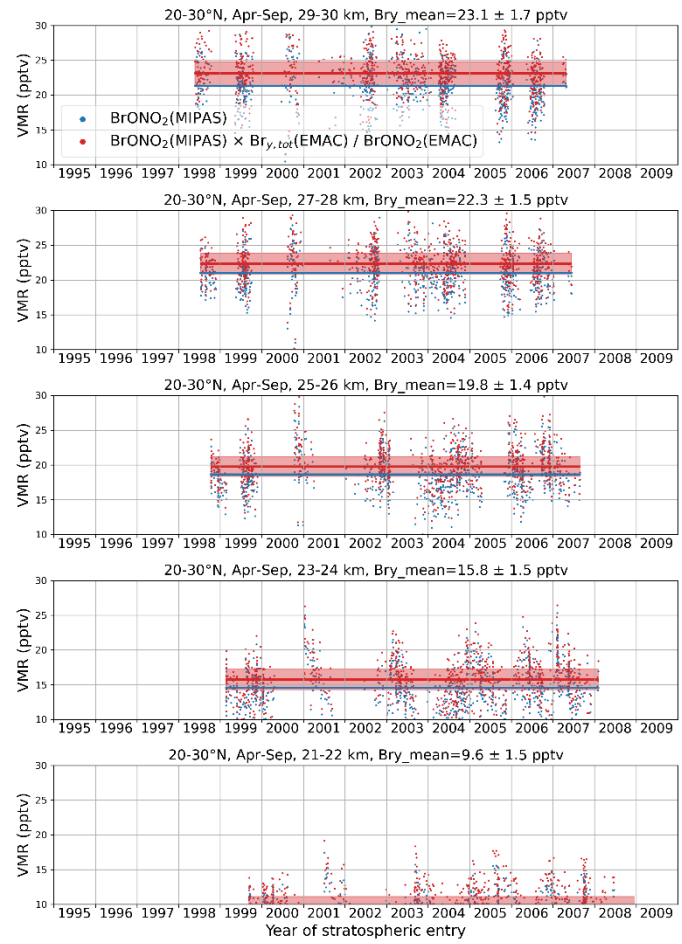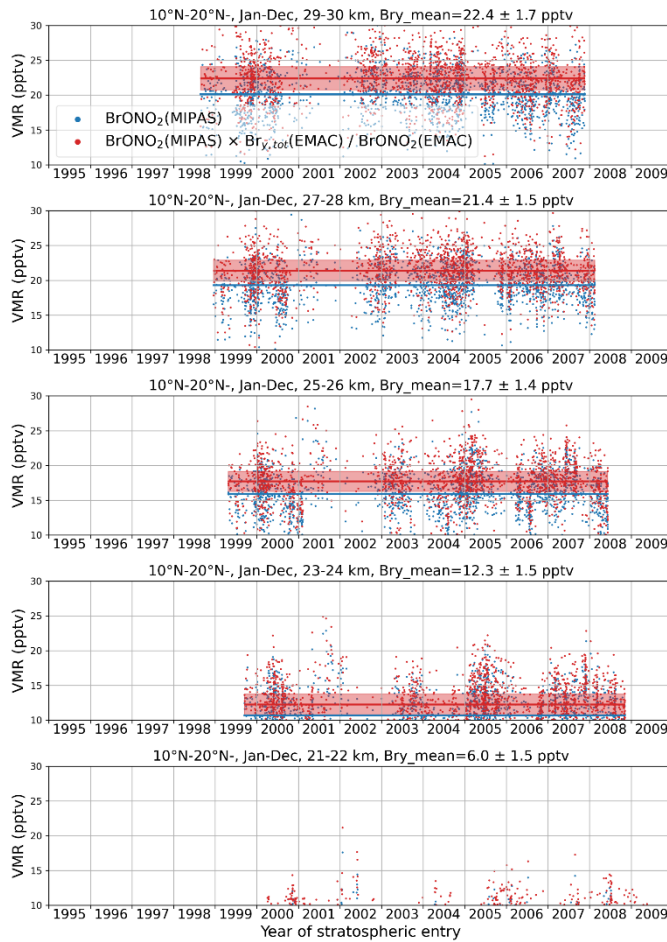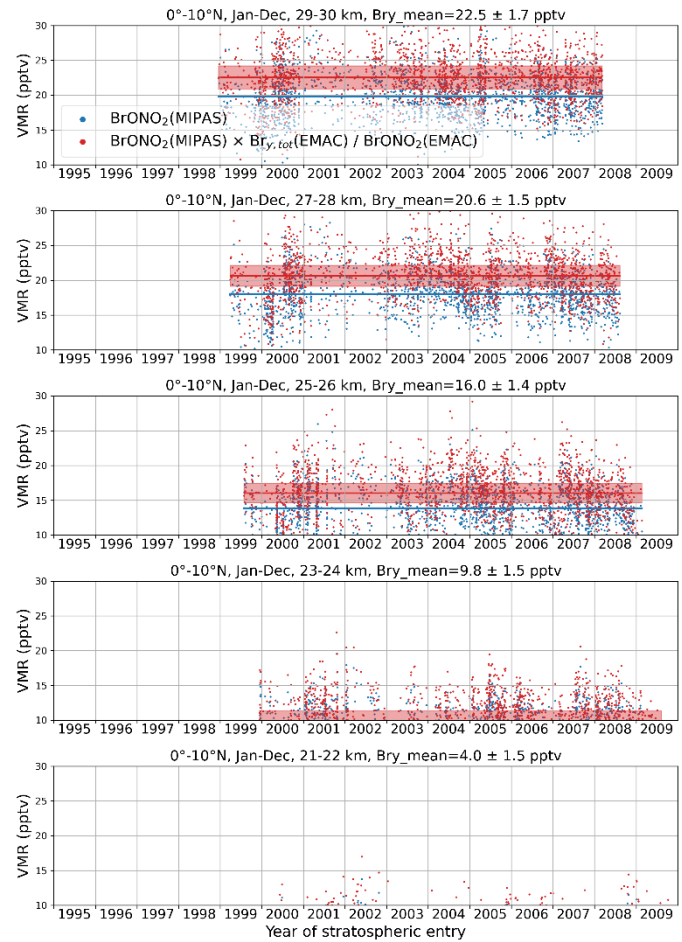



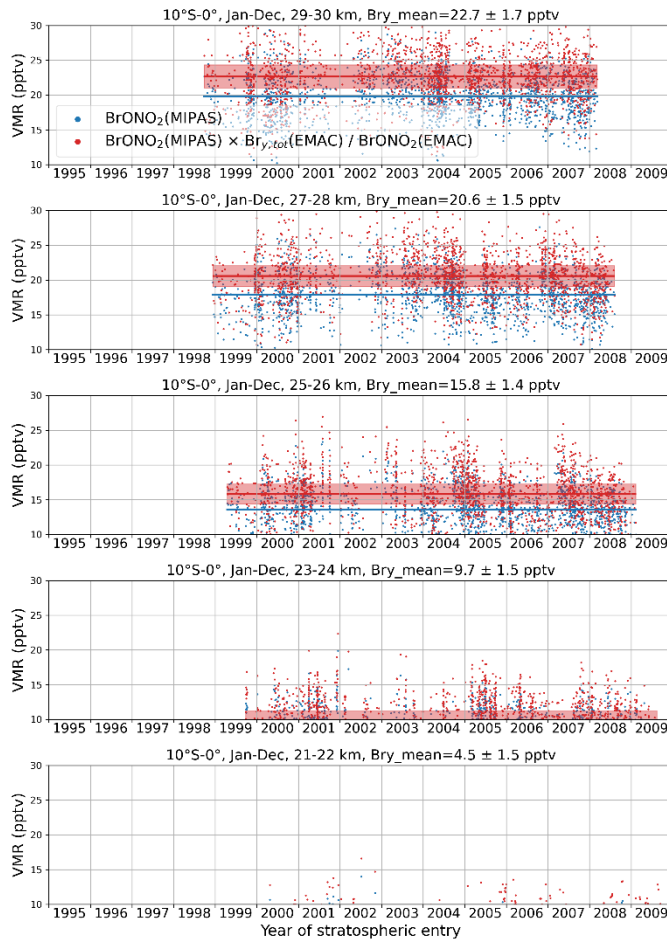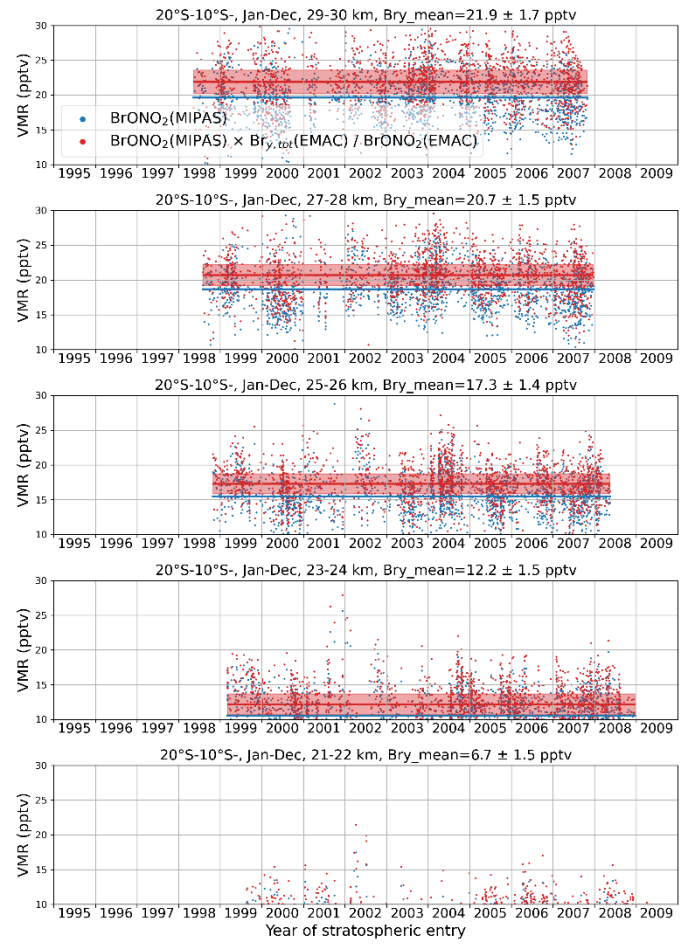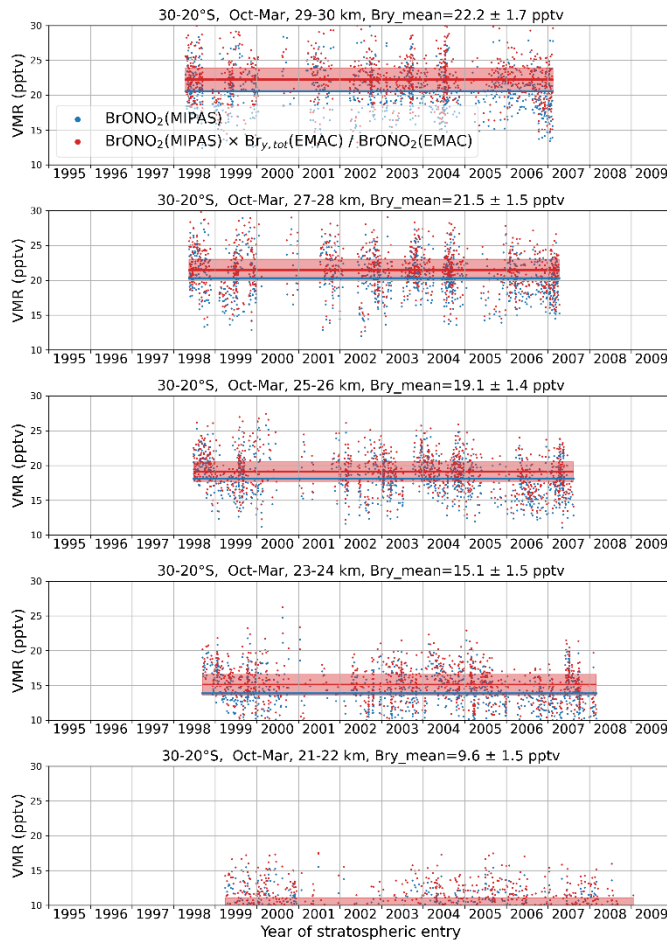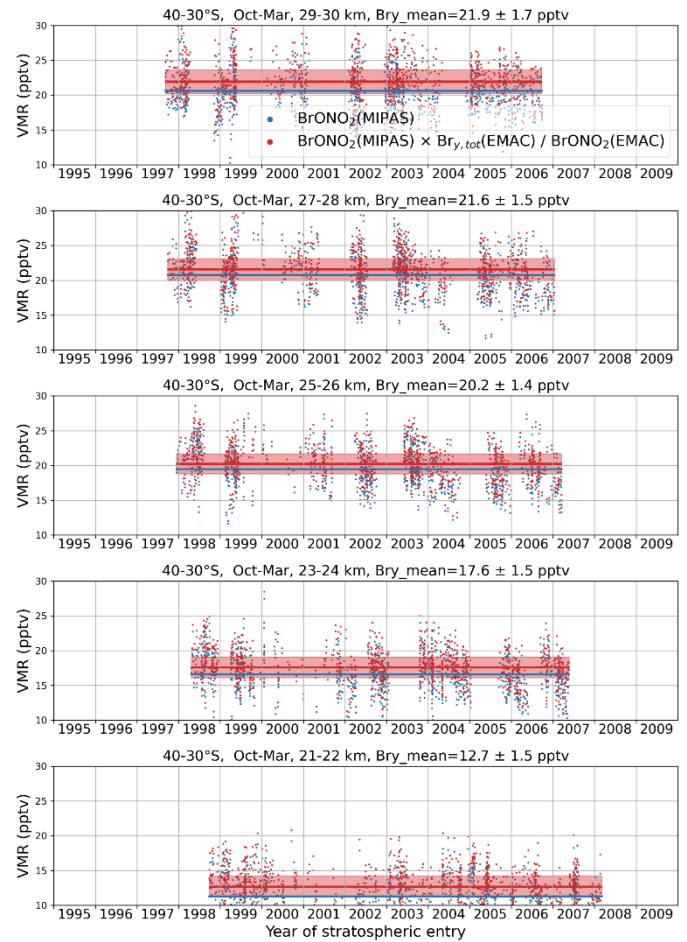

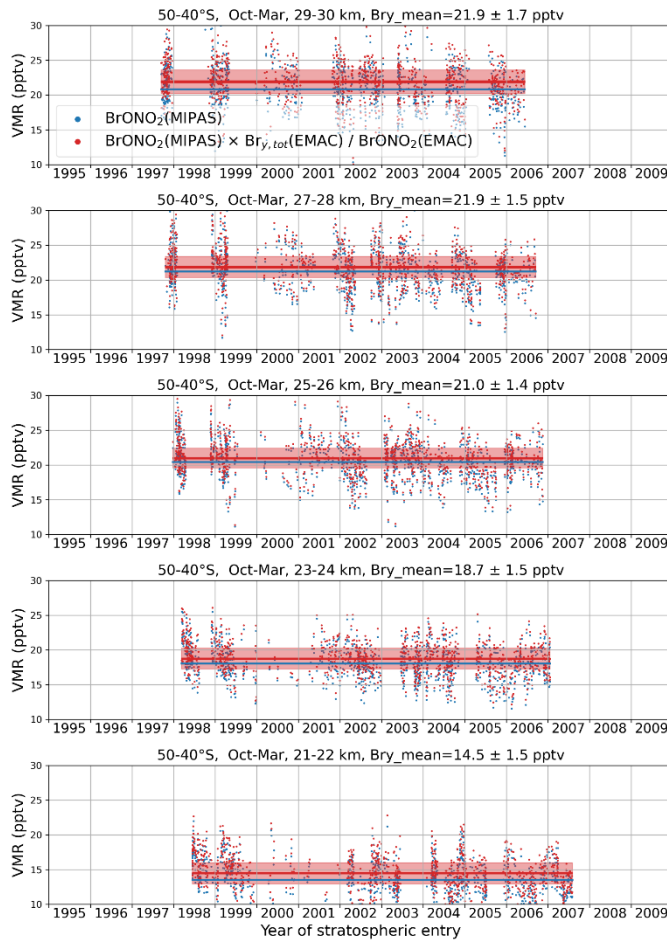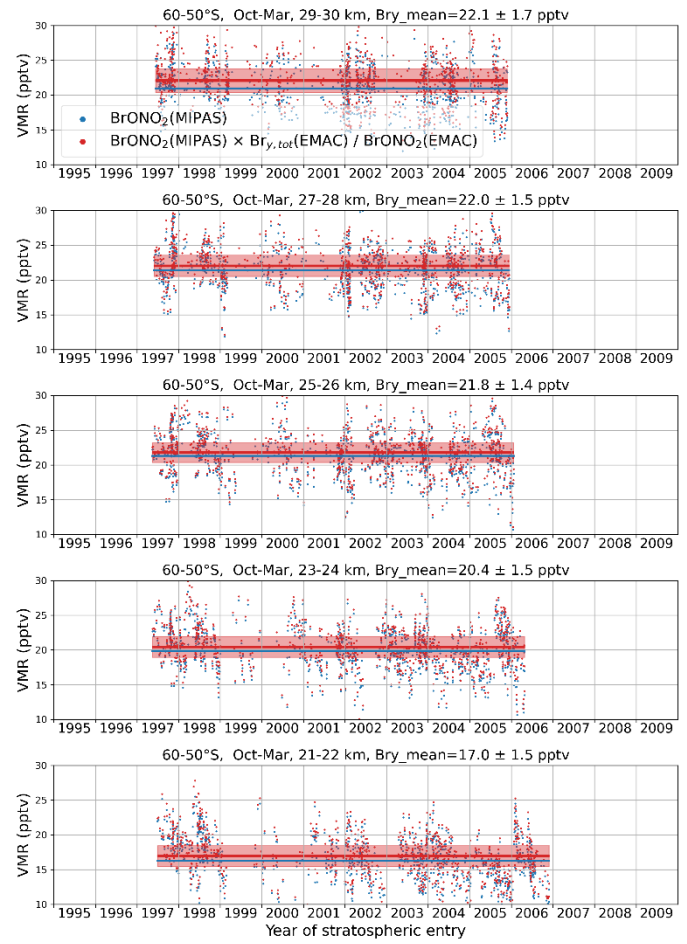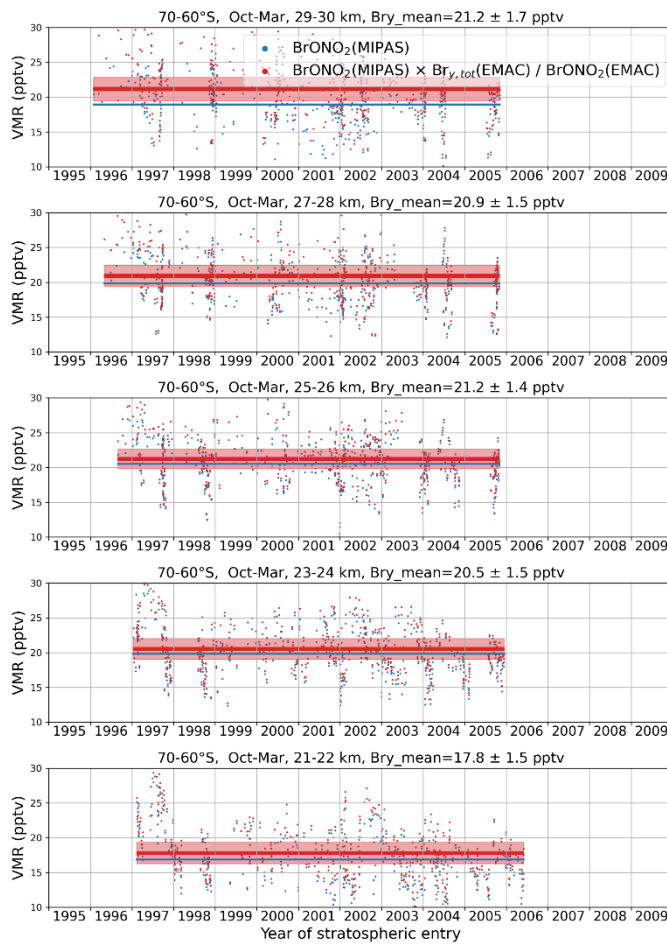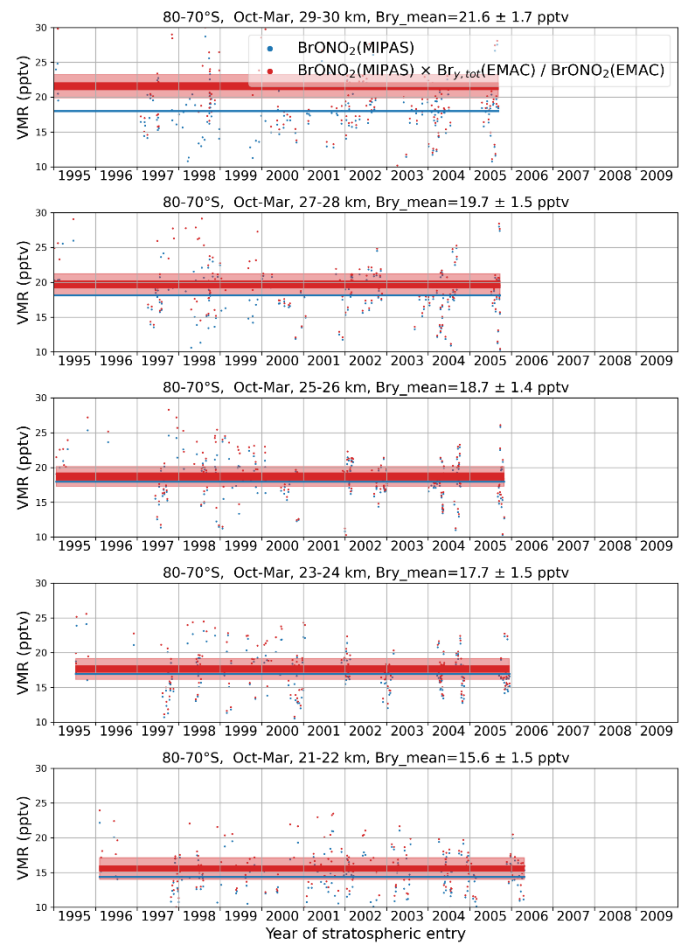

Figure 2: Top: equivalent to Fig. 9 of the manuscript, bottom: equivalent to Fig. 11 of the manuscript, but showing altitude profiles of NO<sub>2</sub> volume mixing ratios.

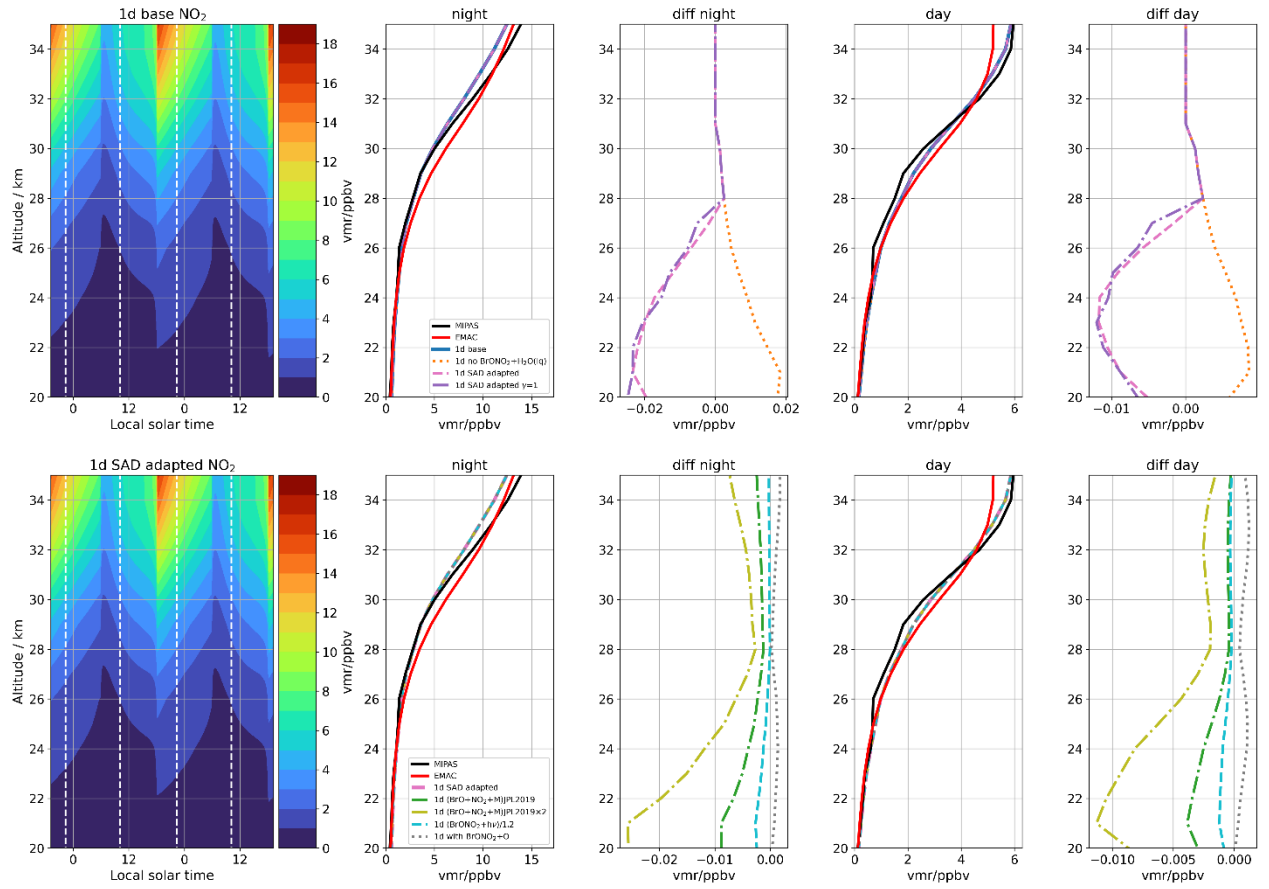

Figure 3: Equivalent to Fig. 9 of the manuscript, but showing relative differences in the 3<sup>rd</sup> and 5<sup>th</sup> panel.

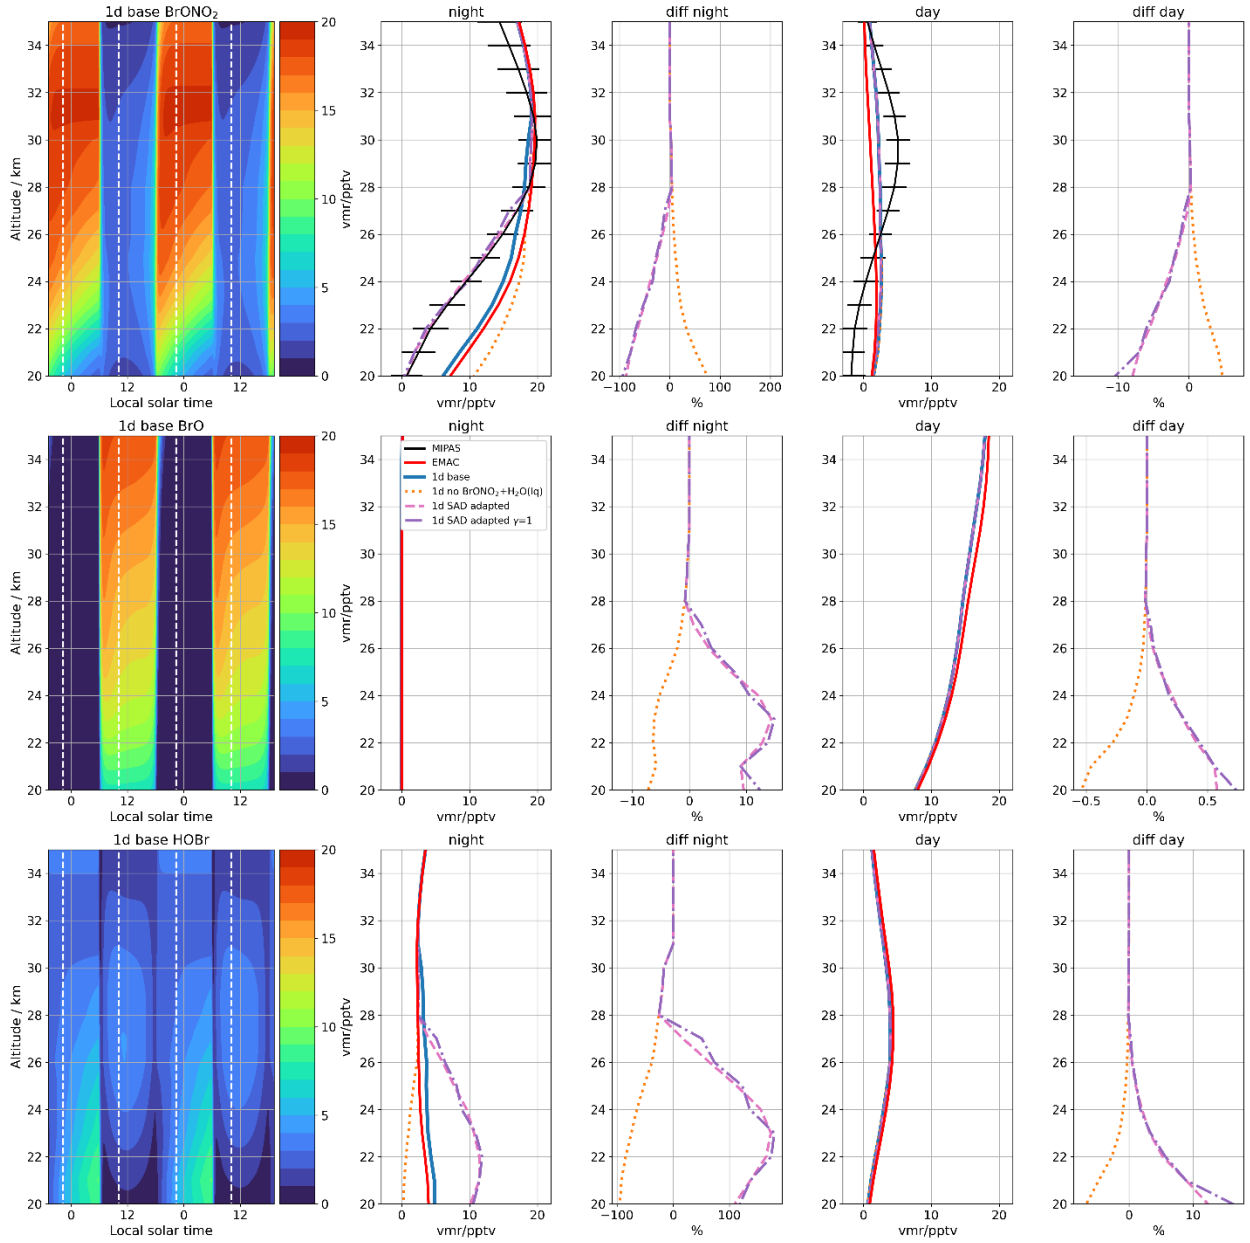



Figure 4: Equivalent to Fig. 12 of the manuscript, but indicating the latitudes (south of 20S: top; 20S-20N: middle; north of 20N: bottom) of the non-MIPAS observations by the larger symbol size.

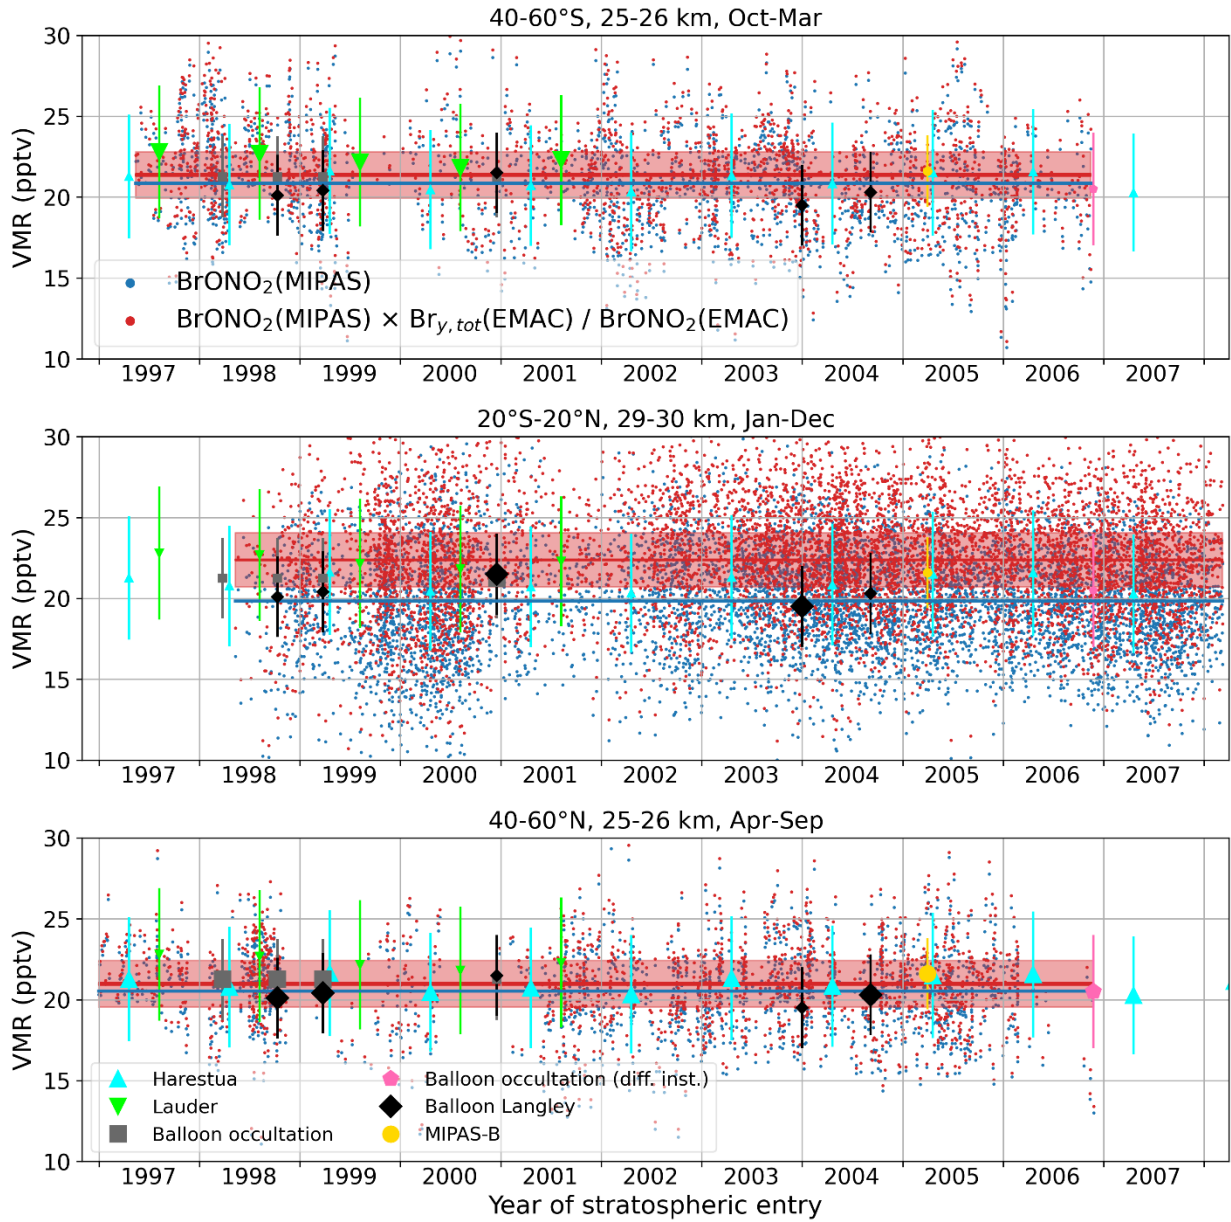

Figure 5: Equivalent to Fig. B1 of the manuscript, but showing also the absolute differences between modelled and measured NO<sub>2</sub> mixing ratios as 3<sup>rd</sup> column.

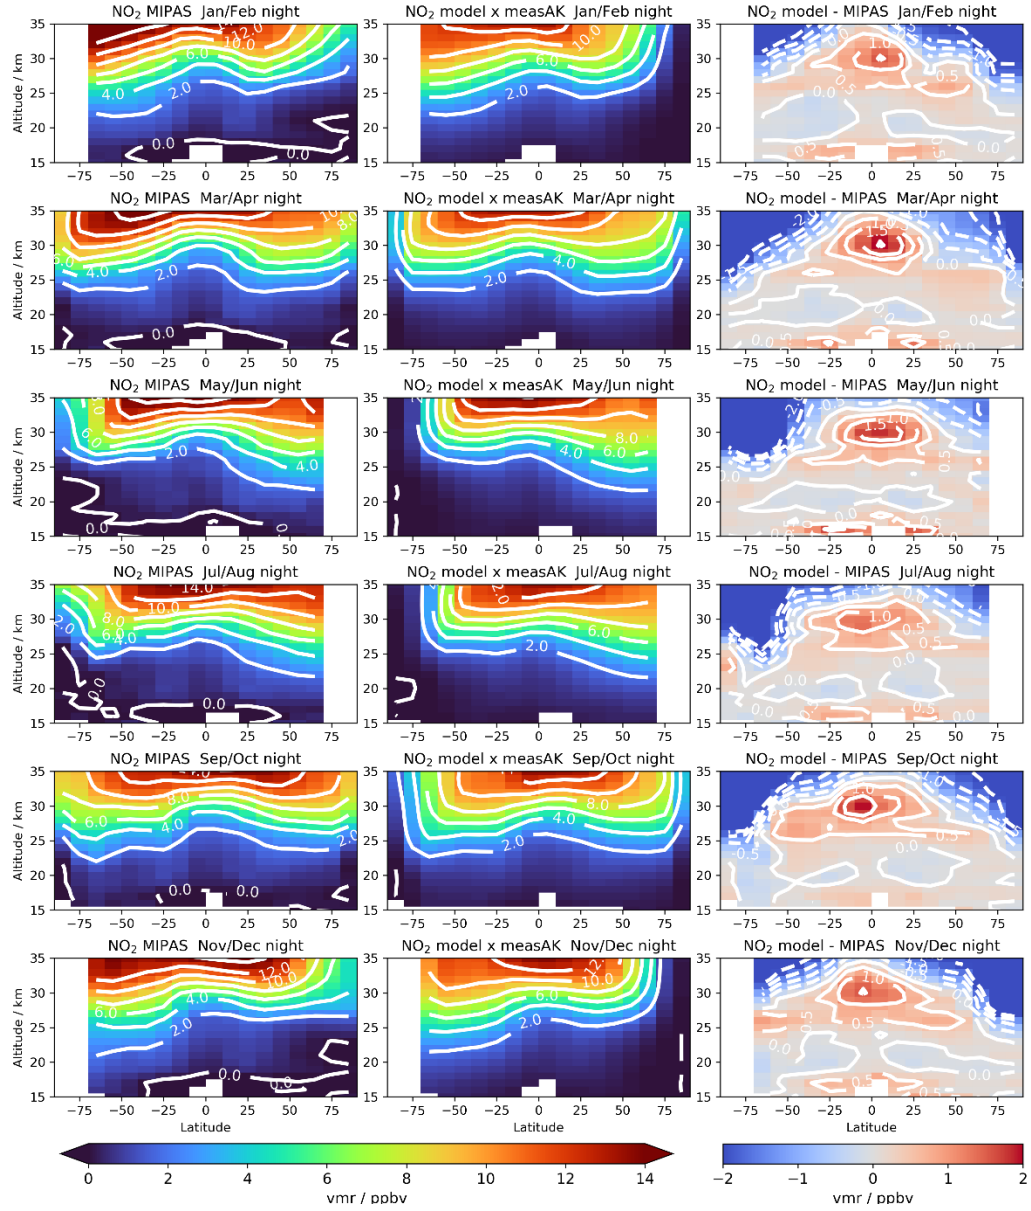

Figure 6: Equivalent to Fig. B2 of the manuscript, but showing also the absolute differences between modelled and measured NO<sub>2</sub> mixing ratios as 3rd column.

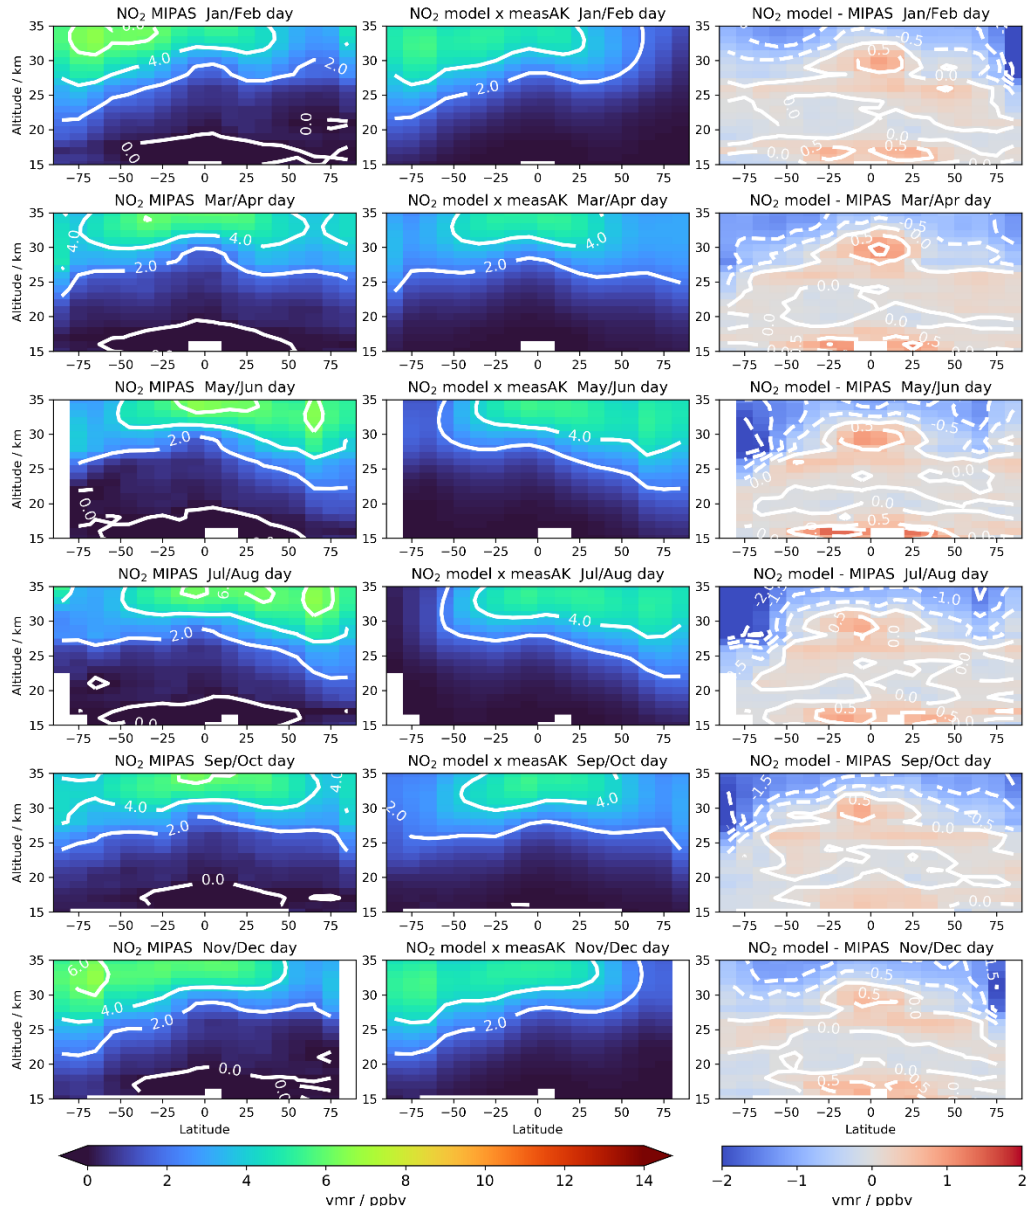

Supplement: Supplementary file [file acp-2021-535-AC2-supplement.pdf]
